# Supplementary material
Source: Springer Nature journal article supplement (https://www.springermedizin.de/resource/supplementary/40345_2013_27_MOESM4_ESM.pdf/25658348)
Supplement: MOESM4 [file 25658348]

**Table 4. Comparison of average stigma scores for people with BD (*n* = 80) before and after the theatrical performance**

| Stigma measures       | T1       |           | T2       |           | Repeated <i>t</i> -test<br>(2-tailed)  | <i>d</i> |
|-----------------------|----------|-----------|----------|-----------|----------------------------------------|----------|
|                       | <i>M</i> | <i>SD</i> | <i>M</i> | <i>SD</i> |                                        |          |
| <b>DMISS</b>          |          |           |          |           |                                        |          |
| Treatability          | 2.48     | 1.16      | 2.33     | 1.19      | <i>t</i> (79) = 1.61, <i>p</i> = 0.111 | 0.17     |
| Relationship          | 3.22     | 1.23      | 3.00     | 1.22      | <i>t</i> (79) = 2.42, <i>p</i> = .018  | 0.27     |
| Hygiene               | 2.44     | 1.30      | 2.35     | 1.36      | <i>t</i> (79) = 0.98, <i>p</i> = .332  | 0.11     |
| Anxiety               | 1.97     | 0.99      | 1.97     | 0.99      | <i>t</i> (79) = 0.03, <i>p</i> = .978  | 0.00     |
| Visibility            | 3.57     | 0.80      | 3.68     | 0.85      | <i>t</i> (79) = -1.10, <i>p</i> = .277 | 0.14     |
| Recovery              | 3.59     | 1.87      | 3.48     | 1.95      | <i>t</i> (79) = 0.69, <i>p</i> = .495  | 0.07     |
| Professional efficacy | 3.18     | 1.52      | 2.99     | 1.53      | <i>t</i> (79) = 1.39, <i>p</i> = .170  | 0.15     |
| Total                 | 2.79     | 0.74      | 2.71     | 0.80      | <i>t</i> (79) = 1.76, <i>p</i> = .083  | 0.19     |
| <b>ISMI</b>           |          |           |          |           |                                        |          |
| Alienation            | 2.35     | 0.70      | 2.23     | 0.77      | <i>t</i> (77) = 2.61, <i>p</i> = .011  | 0.31     |
| Stereotype            | 1.55     | 0.45      | 1.56     | 0.45      | <i>t</i> (76) = -0.48, <i>p</i> = .635 | 0.04     |
| Discrimination        | 2.20     | 0.63      | 2.24     | 0.72      | <i>t</i> (74) = -0.61, <i>p</i> = .542 | 0.08     |
| Withdrawal            | 2.04     | 0.68      | 2.05     | 0.75      | <i>t</i> (78) = -0.32, <i>p</i> = .751 | 0.02     |
| Resistance            | 2.02     | 0.61      | 1.93     | 0.58      | <i>t</i> (76) = 1.14, <i>p</i> = .259  | 0.14     |
| Total                 | 2.01     | 0.49      | 1.98     | 0.55      | <i>t</i> (74) = 1.00, <i>p</i> = .319  | 0.13     |

*Note:* DMISS = Day's Mental Illness Stigma Scale; ISMI = Internalized Stigma of Mental Illness scale
